# Supplementary material for: The Functional Characterization of Carboxylesterases Involved in the Degradation of Volatile Esters Produced in Strawberry Fruits
Source: MDPI journal article supplement (doi:10.3390/ijms24010383), 2022-12-26
Supplement: s1 [file s1]

## Supplementary Figure

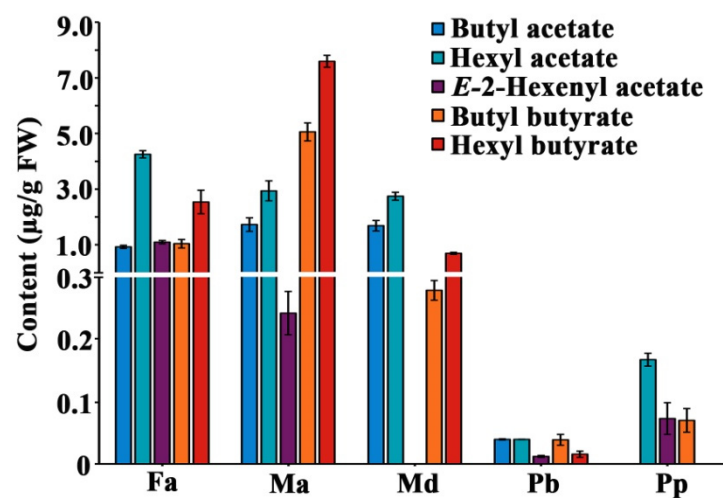

Figure. S1 The content of main volatile esters in five fruits

Note: Fa, strawberry; Ma, banana; Md, apple; Pb, pear; Pp, peach

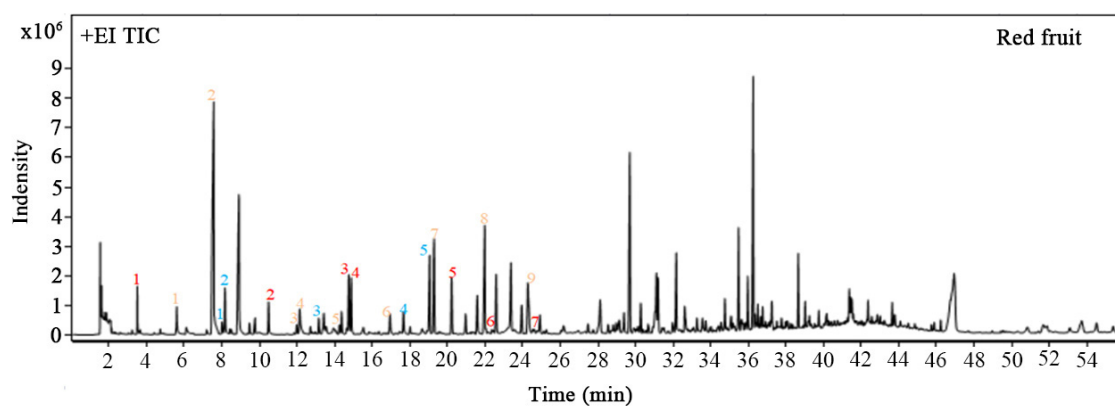

Figure. S2 Ion chromatogram of strawberry extract

Note: Red numbers represent esters, blue numbers represent alcohols and yellow numbers represent aldehydes.
