# Supplementary material for: The Functional Characterization of Carboxylesterases Involved in the Degradation of Volatile Esters Produced in Strawberry Fruits
Source: Int J Mol Sci. 2022 Dec 26;24(1):383. doi: 10.3390/ijms24010383 (PMC9820763; doi:10.3390/ijms24010383)
Supplement: Supplementary file 1 [file ijms-24-00383-s001.zip › Supplementary Tables.xlsx]

## Sheet: Table S1
Supplementary Table S1. Content of aromatic substances in fruits of strawberries at different developmental stages
		Volatile compounds	SG (×10-7)	MG (×10-7)	BG (×10-7)	W (×10-7)	T (×10-7)	R (×10-7)
Esters	1	Methyl Butyrate	0.131	0.0645	0	0	0.39	6.54
	2	Methyl hexanoate	0.829	0.754	0.143	0.248	1.13	25.7
	3	Hexyl acetate	0.302	0.222	0	0.0421	0.327	2.99
	4	E-2-hexenyl acetate	0.244	0.226	0	0	0.403	6.09
	5	Methyl caprylate	0.23	0.138	0	0	0.134	4.88
	6	Methyl phenylacetate	0	0	0	0	0	0.727
	7	Octyl acetate	0.068	0	0	0	0	0.474
	8	E-2-hexenyl butyrate	0	0	0	0	0	0.603
	9	Methyl acetate	0	0.908	1.85	0.894	4.35	8.02
	10	2-pentyl acetate	0.862	0.452	0.322	0.301	0.0626	0
Alcohols	1	E-2-hexenol	1.12	1.69	1.69	1.63	1.94	1.49
	2	1-Hexanol	3.99	3.96	3.03	2.98	2.71	1.32
	3	1-Octen-3-ol	0.396	0.632	0.362	0.293	0.292	0.178
	4	1-Octanol	0.38	0.491	0.29	0.234	0.744	0.314
	5	Linalool	0.883	0.535	0	0	3.6	18.5
Aldehydes	1	Hexanal	52.1	19.7	26.1	30	19.3	13.9
	2	E-2-hexenal	159	168	139	153	113	81.7
	3	E-2-Heptenal	0.275	0.452	0.291	0.37	0.37	0.435
	4	Benzaldehyde	0.954	0.575	0.209	0.0453	0.204	0.78
	5	Octanal	0.575	0.49	0.434	0.339	1.04	0.75
	6	E-2-Octenal	0.254	0.332	0.22	0.298	0.426	0.891
	7	Nonanal	3.07	3.79	1.9	2.44	4.89	3.2
	8	E-2-Nonenal	0.438	0.606	0.324	0.442	1.07	0.483
	9	Decanal	1.07	1.13	0.569	0.692	0.766	0.818

## Sheet: Table S2
Supplementary Table S2. CXE members in strawberry, peach, apple, pear and banana
Groups	Strawberry	Peach	Apple	Pear	Banana
Group 1	FvH4_6g52540.t1 (FaCXE19)	Prupe.1G237400 (PpCXE16)	EB106571 (MdCXE16)	rna26204 (PbCXE32)	XP_009396803.1 (MaCXE29)
	FvH4_4g24810.t1 (FaCXE20)	Prupe.3G299300 (PpCXE17)		rna24709 (PbCXE33)	XP_009405770.1 (MaCXE31)
					XP_009410653.1 (MaCXE32)
					XP_009414677.1 (MaCXE33)
Group 2	FvH4_7g12500.t1 (FaCXE17)	Prupe.2G149600 (PpCXE18)	ES789967 (MdCXE4)	rna2366 (PbCXE10)	XP_009406873.1 (MaCXE18)
	FvH4_7g12520.t1 (FaCXE18)	Prupe.2G286500 (PpCXE19)	EG631362 (MdCXE14)		XP_018679913.1 (MaCXE20)
	FvH4_7g28660.t1 (FaCXE34)	Prupe.2G286600 (PpCXE20)	CN942679 (MdCXE15)		XP_009409802.1 (MaCXE28)
	FvH4_7g28650.t1 (FaCXE35)	Prupe.2G286700 (PpCXE21)
Group 3	FvH4_2g06620.t1 (FaCXE1)	Prupe.8G121900 (PpCXE1)	ES789969 (MdCXE2)	rna9754 (PbCXE6)	XP_009391348.1 (MaCXE1)
	FvH4_2g06560.t1 (FaCXE2)	Prupe.8G120800 (PpCXE2)	ES789964 (MdCXE3)	rna52290 (PbCXE17)	XP_009403354.1 (MaCXE2)
	FvH4_2g06540.t1 (FaCXE3)	Prupe.8G121100 (PpCXE3)	ES789968 (MdCXE5)	rna47697 (PbCXE18)	XP_009403370.1 (MaCXE3)
	FvH4_2g06480.t1 (FaCXE7)	Prupe.8G120900 (PpCXE4)	ES789979 (MdCXE6)	rna47694 (PbCXE19)	XP_009401277.1 (MaCXE4)
	FvH4_2g06450.t1 (FaCXE8)	Prupe.8G121000 (PpCXE5)	ES789974 (MdCXE7)	rna51125 (PbCXE21)	XP_009401278.1 (MaCXE5)
	FvH4_2g34680.t1 (FaCXE9)	Prupe.8G121200 (PpCXE6)	ES789984 (MdCXE8)	rna1339 (PbCXE23)	XP_009409302.1 (MaCXE6)
	FvH4_2g29190.t1 (FaCXE10)	Prupe.8G121300 (PpCXE7)	ES789970 (MdCXE10)	rna1336 (PbCXE24)	XP_009418893.2 (MaCXE7)
	FvH4_2g06400.t1 (FaCXE11)	Prupe.8G121400 (PpCXE8)		rna52817 (PbCXE25)	XP_009410114.1 (MaCXE8)
	FvH4_4g15010.t1 (FaCXE22)	Prupe.8G121500 (PpCXE9)		rna21613 (PbCXE26)	XP_009418894.2 (MaCXE9)
	FvH4_4g15000.t1 (FaCXE25)	Prupe.8G121700 (PpCXE10)		rna52410 (PbCXE28)	XP_009400390.1 (MaCXE10)
	FvH4_4g15020.t1 (FaCXE26)	Prupe.8G122000 (PpCXE11)		rna12072 (PbCXE29)
	FvH4_2g19350.t1 (FaCXE27)	Prupe.1G155100 (PpCXE12)		rna18299 (PbCXE30)
	FvH4_2g06520.t1 (FaCXE29)	Prupe.1G155200 (PpCXE13)		rna39558 (PbCXE31)
	FvH4_2g06530.t1 (FaCXE30)	Prupe.1G439300 (PpCXE14)
	FvH4_2g06490.t1 (FaCXE31)	Prupe.1G480100 (PpCXE15)
	FvH4_2g06430.t1 (FaCXE32)
	FvH4_2g34730.t1 (FaCXE33)
Group 4	FvH4_2g09720.t1 (FaCXE4)	Prupe.4G252600 (PpCXE22)	ES789959 (MdCXE1)	rna27500 (PbCXE1)	XP_009416973.1 (MaCXE14)
	FvH4_3g28600.t1 (FaCXE5)	Prupe.6G332800 (PpCXE23)	ES790010 (MdCXE12)	rna29536 (PbCXE2)	XP_009412186.1 (MaCXE15)
	FvH4_2g00440.t1 (FaCXE6)	Prupe.8G004100 (PpCXE24)		rna48582 (PbCXE3)	XP_009416972.1 (MaCXE16)
	FvH4_2g24370.t1 (FaCXE21)	Prupe.8G090400 (PpCXE25)		rna28453 (PbCXE4)	XP_009385587.1 (MaCXE17)
	FvH4_3g11720.t1 (FaCXE23)	Prupe.8G249800 (PpCXE26)		rna36624 (PbCXE5)	XP_009407061.1 (MaCXE19)
	FvH4_6g04960.t3 (FaCXE24)				XP_009382605.1 (MaCXE21)
					XP_009402467.1 (MaCXE22)
					XP_009407064.1 (MaCXE23)
					XP_009402465.1 (MaCXE24)
					XP_009393108.1 (MaCXE25)
					XP_009404702.1 (MaCXE26)
					XP_018675549.1 (MaCXE27)
Group 5	FvH4_3g26900.t1 (FaCXE12)	Prupe.6G149100 (PpCXE27)	ES789966 (MdCXE9)	rna5020 (PbCXE15)	XP_009406562.1 (MaCXE13)
	FvH4_6g21100.t1 (FaCXE28)	Prupe.7G089000 (PpCXE28)		rna2315 (PbCXE22)
Group 6	FvH4_6g45240.t1 (FaCXE13)	Prupe.1G307700 (PpCXE29)		rna11053 (PbCXE7)	XP_009421110.1 (MaCXE11)
	FvH4_4g27710.t1 (FaCXE14)	Prupe.3G238500 (PpCXE30)		rna49192 (PbCXE9)	XP_009404788.1 (MaCXE12)
				rna6334 (PbCXE14)
				rna1126 (PbCXE27)
Group 7	FvH4_7g04040.t1 (FaCXE15)	Prupe.2G044700 (PpCXE31)	EG631279 (MdCXE11)	rna15982 (PbCXE8)	XP_009412187.1 (MaCXE30)
	FvH4_7g04070.t1 (FaCXE16)	Prupe.2G045000 (PpCXE32)	ES789965 (MdCXE13)	rna25049 (PbCXE11)	XP_009381317.1 (MaCXE34)
		Prupe.2G045300 (PpCXE33)		rna25047 (PbCXE12)
				rna25050 (PbCXE13)
				rna25045 (PbCXE16)
				rna25048 (PbCXE20)

## Sheet: Table S3
Supplementary Table S3. PCR primers sequence
Purpose	Gene name	Primer name	Primer sequence (5'-3')
Cloning	FaCXE2	End-to-end F	ATGGACCCAGCAACCCAAAACG
		End-to-end R	CATTGGAATGCGGCCCAGCTGTC
	FaCXE3	End-to-end F	ATGAAAATGGAACCCCCACC
		End-to-end R	CACCGCCCACGAGTCTTCGTAG
Prokaryotic expression	FaCXE2	FaCXE2-PRSF-F	CACCATCATCACCACAGCCAGGATCCGATGGACCCAGCAACCCAAAACG
		FaCXE2-PRSF-R	GGCGCGCCGAGCTCGAATTCGGATCCTTATTCCTGATTCATGAAAGC
	FaCXE3	FaCXE3-PRSF-F	CACCATCATCACCACAGCCAGGATCCGATGAAAATGGAACCCCCACC
		FaCXE3-PRSF-R	GGCGCGCCGAGCTCGAATTCGGATCCCTACCCTGCTTGATTGATGAA
Eukaryotic expression	FaCXE2	FaCXE2-BP-F	GGGGACAAGTTTGTACAAAAAAGCAGGCTATGGACCCAGCAACCCAAAACG
		FaCXE2-BP-R	GGGGACCACTTTGTACAAGAAAGCTGGGTTTATTCCTGATTCATGAAAGC
	FaCXE3	FaCXE3-BP-F	GGGGACAAGTTTGTACAAAAAAGCAGGCTATGAAAATGGAACCCCCACC
		FaCXE3-BP-R	GGGGACCACTTTGTACAAGAAAGCTGGGTCTACCCTGCTTGATTGATGAA
